# Supplementary material
Source: Springer Nature journal article supplement (https://www.springermedizin.de/resource/supplementary/12889_2010_2894_MOESM5_ESM.pdf/9487592)
Supplement: MOESM5 [file 9487592]

### SURVEY I MEN

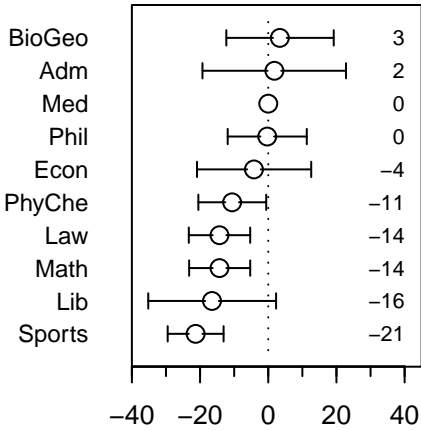

### SURVEY II MEN

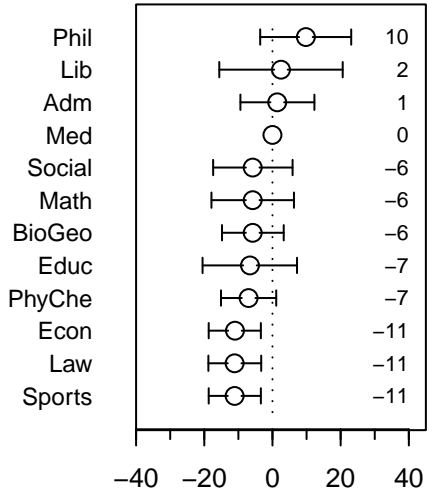

### SURVEY I WOMEN

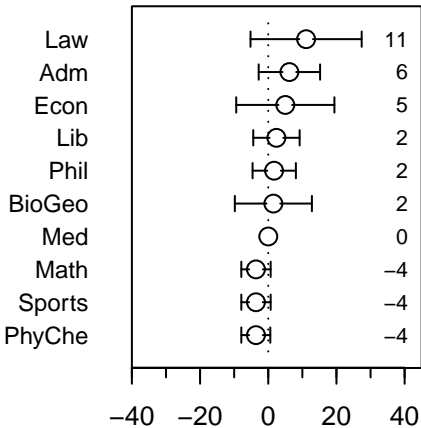

### SURVEY II WOMEN

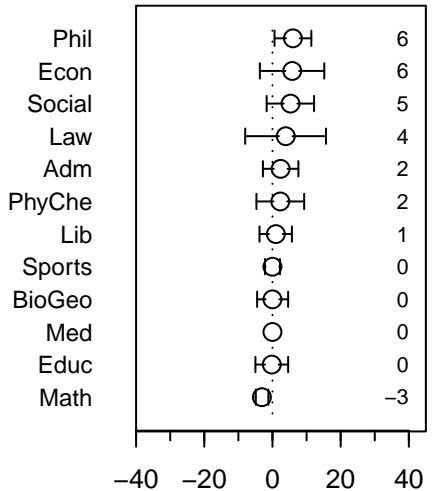

Adjusted difference vs Med (%)

Adjusted difference vs Med (%)
